# Supplementary material for: Germanium encapsulated in sulfur and nitrogen co-doped 3D porous carbon as an ultra-long-cycle life anode for lithium ion batteries
Source: Royal Society of Chemistry journal article supplement (doi:10.1039/c6ta08681k), 2016-01-01
Supplement: c6ta08681k1.pdf [file c6ta08681k1.pdf]

# Supporting Information

## **Germanium Encapsulated in Sulfur and Nitrogen Co-doped 3D Porous Carbon as Ultra-Long-Cycle Life Anode for Lithium Ion Batteries**

Chenglong Yang,<sup>a</sup> Yu Jiang,<sup>a</sup> Xiaowu Liu,<sup>a</sup> Xiongwu Zhong,<sup>a</sup> and Yan Yu,<sup>a,b,\*</sup>

<sup>a</sup> Key Laboratory of Materials for Energy Conversion, Chinese Academy of Sciences, Department of Chemistry and Materials Science, University of Science and Technology of China, Hefei, Anhui, 230026, China

<sup>b</sup> State Key Laboratory of Fire Science, University of Science and Technology of China, Hefei, Anhui, 230026, China

\*Address correspondence to [yanyumse@ustc.edu.cn](mailto:yanyumse@ustc.edu.cn)

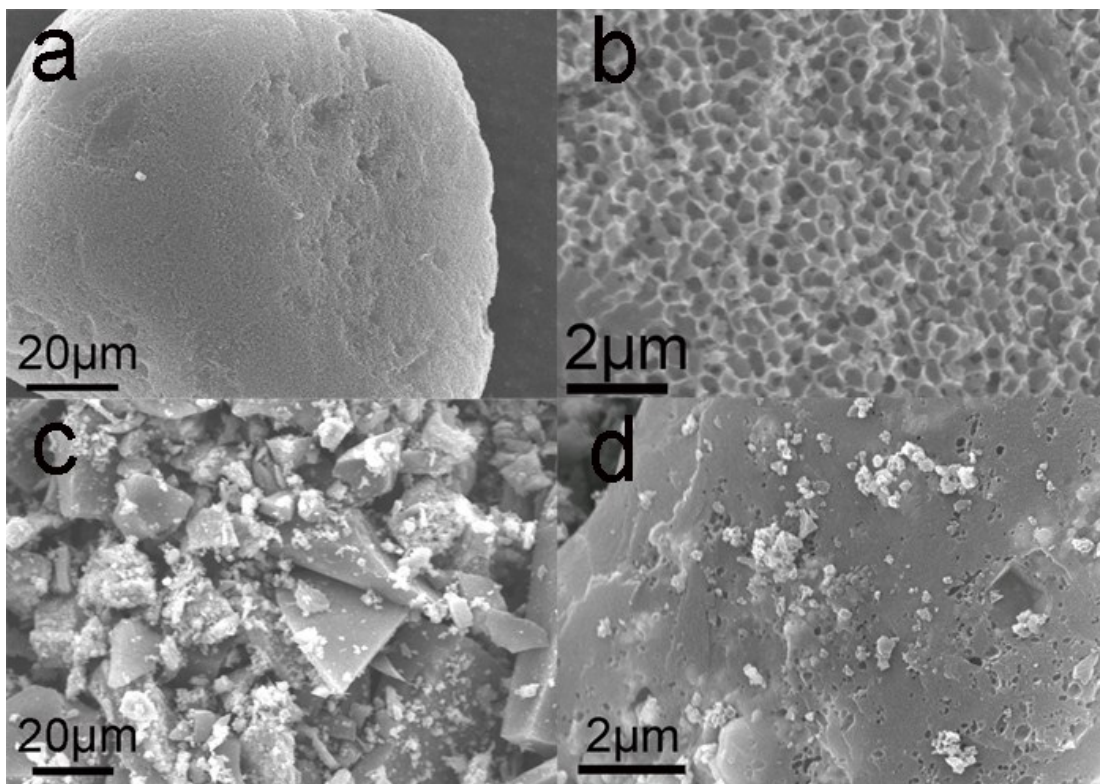

**Figure S1.** SEM images of (a),(b) S,N-3DPC and (c),(d) Ge@S,N-C.

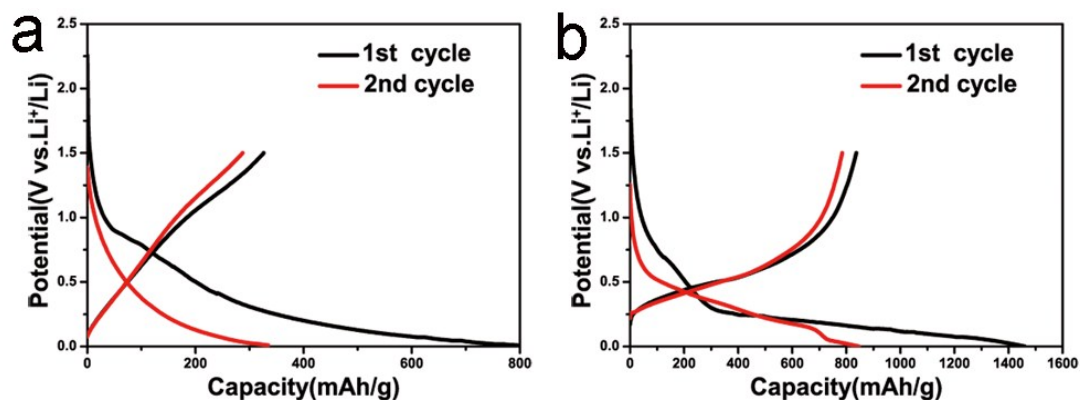

**Figure S2.** The initial two voltage-capacity curves of (a) S,N-3DPC and (b) Ge@S,N-C at 200 mA g<sup>-1</sup>.

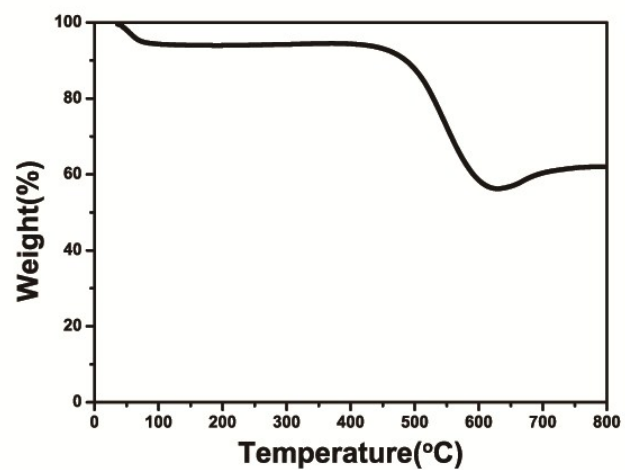

**Figure S3.** TG curve of the Ge@S,N-3DPC. After calculating, percentage composition of Ge is 60%.
